# Supplementary material
Source: Springer Nature journal article supplement (https://www.springermedizin.de/resource/supplementary/13075_2011_3282_MOESM6_ESM.pdf/9694186)

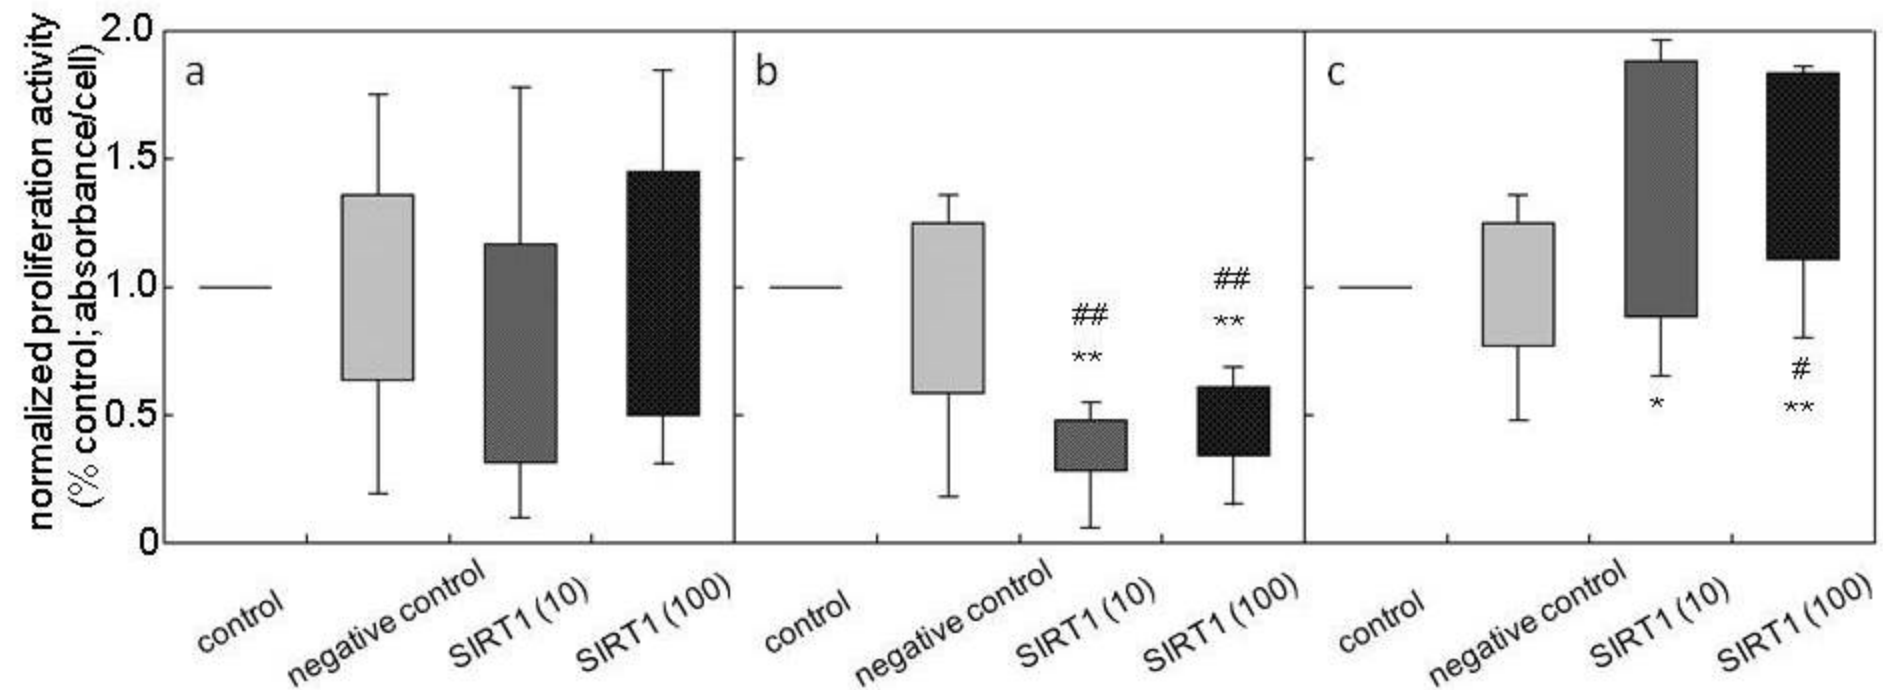

\* :  $p < 0.05$ , vs. control

\*\* :  $p < 0.01$ , vs. control

# :  $p < 0.05$ , vs. negative control

## :  $p < 0.01$ , vs. negative control

Supplement: MOESM6 [file 9694186]
